# Supplementary material for: Radiomics and Artificial Intelligence in Uterine Sarcomas: A Systematic Review
Source: MDPI journal article supplement (doi:10.3390/jpm11111179), 2021-11-11
Supplement: s1 [file s1]

| <b>Supplementary Table S1.</b> Boolean combinations of the key terms used |                                                                                                                                                                                                                                                                                                                                                                                                                                                                                                                                                                                |
|---------------------------------------------------------------------------|--------------------------------------------------------------------------------------------------------------------------------------------------------------------------------------------------------------------------------------------------------------------------------------------------------------------------------------------------------------------------------------------------------------------------------------------------------------------------------------------------------------------------------------------------------------------------------|
| <b>Database</b>                                                           | <b>Free-vocabulary and/or Medical Subject Headings (MeSH) terms</b>                                                                                                                                                                                                                                                                                                                                                                                                                                                                                                            |
| Pubmed<br>And Cochrane<br>Library                                         | ((uterine neoplasms[Title/Abstract] OR uterine sarcomas[Title/Abstract] OR uterine fibroids[Title/Abstract] OR endometrial cancer[Title/Abstract]) OR ("Uterine Neoplasms"[Mesh])) AND ((radiomics[Title/Abstract]) OR (("Artificial Intelligence"[Majr]) OR (robotics[Title/Abstract] OR AI[Title/Abstract] OR expert system[Title/Abstract] OR expert systems[Title/Abstract] OR intelligent retrieval[Title/Abstract] OR knowledge engineering[Title/Abstract] OR machine learning[Title/Abstract] OR natural language processing[Title/Abstract])))<br><br>Filters: Female |
| Scopus                                                                    | ((TITLE-ABS-KEY (image AND interpretation OR "image processing")) AND (TITLE-ABS-KEY ("uterine neoplasms"))) OR (TITLE-ABS-KEY ("medical image analysis")) OR (TITLE-ABS-KEY (radiomics)) AND ((TITLE-ABS-KEY ("uterine neoplasms")) OR (TITLE-ABS-KEY ("endometrial cancer" OR "cervical cancer" OR "uterine sarcomas" OR "uterine fibromas"))) AND (LIMIT-TO (EXACTKEYWORD, "Image Processing, Computer-Assisted"))                                                                                                                                                          |
